# Supplementary material
Source: PubMed Central journal article supplement (PMC6745911)
Supplement: hs9-2-e146-s001.pdf [file hs9-2-e146-s001.pdf]

# 1 Supplemental material:

## A previously unrecognized Ca<sup>2+</sup>-inhibited non-selective cation channel in red blood cells

2 *Polina Petkova-Kirova*<sup>1</sup>, *Laura Hertz*<sup>1</sup>, *Asya Makhro*<sup>2</sup>, *Jens Danielczok*<sup>1</sup>, *Rick Huisjes*<sup>4</sup>,  
3 *Esther Llaudet-Planas*<sup>3</sup>, *Maria del Mar Mañú-Pereira*<sup>3</sup>, *Joan-Luis Vives Corrons*<sup>3</sup>, *Richard*  
4 *van Wijk*<sup>4</sup>, *Anna Bogdanova*<sup>2</sup>, *Lars Kaestner*<sup>5</sup>

5

6 <sup>1</sup>Research Centre for Molecular Imaging and Screening, Medical School, Institute for  
7 Molecular Cell Biology, Saarland University, Homburg/Saar, Germany

8 <sup>2</sup>Red Blood Cell Research Group, Institute of Veterinary Physiology, Vetsuisse Faculty and  
9 the Zurich Center for Integrative Human Physiology (ZIHP), University of Zurich, Zurich,  
10 Switzerland

11 <sup>3</sup>Red Blood Cell defects and Hematopoietic disorders unit, Josep Carreras Leukaemia  
12 Research Institute, Badalona, Barcelona, Spain

13 <sup>4</sup>Department of Clinical Chemistry and Haematology, University Medical Center Utrecht,  
14 Utrecht, The Netherlands

15 <sup>5</sup>Theoretical Medicine and Biosciences, Saarland University, Homburg/Saar and  
16 Experimental Physics, Saarland University, Saarbruecken, Germany

17

### 18 **Materials and Methods**

#### 19 *Blood*

20 Blood was obtained from healthy donors after giving an informed consent in compliance  
21 with the ethical requirements of the Saarland University, Homburg, Germany (Ärztchamber  
22 des Saarlandes, approval number 132/08) and the University of Zürich, Zürich, Switzerland,  
23 (the Canton's ethics committee of canton Zürich, KEK ZH NR 2010-0237). The study was  
24 carried out in accordance with the Helsinki Declaration of 1975, as revised in 2008. A blood  
25 collection system by Becton and Dickinson (Vacutainer Blood Collection Set REF 367282,  
26 Becton, Dickinson and Co., Franklin Lakes, NJ, USA) and the same batches of 9 ml  
27 containers for K3EDTA (referred to as EDTA) and Sodiumheparin (referred to as heparin)  
28 (Vacuette, Becton, Dickinson and Co., Franklin Lakes, NJ, USA) were used.

#### 29 *Patch-clamp*

30 Patch-clamp measurements were performed with a NPC-16 Patchliner (Nanion  
31 Technologies, Munich, Germany) as previously described<sup>1</sup>. The resistance of the chips was  
32 between 5 and 8 MΩ. Gigaseals were considered successful if exceeding 5 GΩ. Gigaseal  
33 formation was facilitated by the use of a seal enhancing solution as recommended by the

34 Patchliner manufacturer and containing (in mM): NaCl 80, KCl 3, MgCl<sub>2</sub> 10, CaCl<sub>2</sub> 35,  
35 HEPES 10, pH=7.3 adjusted with NaOH. Whole-cell configuration was achieved by negative  
36 pressure suction pulses between -45 mbar and -150 mbar and its formation judged by the  
37 appearance of sharp capacitive transients. Whole-cell patch-clamp recordings were  
38 conducted using voltage steps from -100 mV to 100 mV for 500 ms in 20 mV increments at  
39 5 s intervals, the holding potential being set at -30 mV. To reduce inter-cell variability in  
40 currents, data are expressed as normalized current which is the ratio of the current under  
41 specified experimental conditions i.e. in 0 mM Ca<sup>2+</sup> external solution or in a solution with  
42 Ca<sup>2+</sup> (2 or 20 mM Ca<sup>2+</sup>), to the current at +100 mV determined 30–60 s before starting the  
43 measurement in 0 mM Ca<sup>2+</sup>. The Ca<sup>2+</sup> blocked current is the current obtained as a result of  
44 the subtraction of the current recorded in 2 mM Ca<sup>2+</sup> from the current recorded in 0 mM  
45 Ca<sup>2+</sup> external solution. Before subtraction currents were normalized. All measurements were  
46 performed at room temperature. Current recordings in 2 mM Ca<sup>2+</sup> solutions were all  
47 performed at 5 GΩ and above and the seals were maintained throughout the 0 mM Ca<sup>2+</sup>  
48 solutions measurements as follows: 81% (13 out of 16 cells) at 5 Gohm and above; 6% (1  
49 cell) at 4.4 GΩ and 13% (2 cells) at 4 GΩ. Data are presented as means ± SEMs and  
50 statistical significance evaluated using a paired Student t-test. N is the number of cells and  
51 in brackets after “n” is the number of donors. Cell capacitance (n=16 cells) was 0.59±0.04  
52 pF.

53 Solutions used to study the Ca<sup>2+</sup> blocked channel were as follows (in mM):

54 I. For experiments using a Cs<sup>+</sup>-based internal and a TEACl-based external solutions:

- 55 • Internal: 50CsCl, 20NaCl, 60CsF, 5MgATP, 10HEPES, 20EGTA, pH=7.2 with CsOH
- 56 • External 0mM Ca<sup>2+</sup>: 125TEACl, 10HEPES, 5MgCl<sub>2</sub>, 45glucose, pH=7.3 with TEAOH
- 57 • External 2mM Ca<sup>2+</sup>: 125TEACl, 10HEPES, 5MgCl<sub>2</sub>, 45glucose, 2mM CaCl<sub>2</sub> pH=7.3 with  
58 TEAOH

59 II. For experiments using a Cs<sup>+</sup>-based internal and an external solution without Cl<sup>-</sup>:

- 60 • Internal: 50CsCl, 20NaCl, 60CsF, 5MgATP, 10HEPES, 20EGTA, pH=7.2 with CsOH
- 61 • External 0mM Ca<sup>2+</sup>: 125TEANO<sub>3</sub>, 10HEPES, 5MgSO<sub>4</sub>, 45glucose, pH=7.3 with TEAOH
- 62 • External 2mM Ca<sup>2+</sup>: 125TEANO<sub>3</sub>, 10HEPES, 5MgSO<sub>4</sub>, 45glucose, 2mM Ca gluconate ,  
63 pH=7.3 with TEAOH

64 III. For experiments using physiological internal and external solutions:

- 65 • Internal: 70KCl, 70KF, 10NaCl, 10HEPES, 3EGTA, 1.2CaCl<sub>2</sub>, 3MgATP, pH=7.2 with  
66 KOH
- 67 • External 0mM Ca<sup>2+</sup>: 140NaCl, 4KCl, 10HEPES, 5MgCl<sub>2</sub> 5glucose, pH=7.3 with NaOH
- 68 • External 20mM Ca<sup>2+</sup>: 115NaCl, 4KCl, 10HEPES, 5MgCl<sub>2</sub>, 20CaCl<sub>2</sub>, pH=7.3 with NaOH
- 69 • External 2mM Ca<sup>2+</sup>: 140NaCl, 4KCl, 10HEPES, 5MgCl<sub>2</sub>, 5glucose, 2CaCl<sub>2</sub> pH=7.3 with  
70 NaOH

71 F- in the internal solution is a necessary requirement to achieve gigaseals when recording  
72 from erythrocytes. Inclusion of fluoride has long been known to facilitate and improve patch-  
73 clamp sealing with subsequent longer and more stable patch-clamp recordings.<sup>2</sup> Relative to  
74 this however a note should be made on the RBC membrane permeability reported to be  
75 similar for Cl<sup>-</sup> and F<sup>-</sup> both in its DIDS sensitive and DIDS insensitive part.<sup>3</sup>

76 *Ion measurements of blood plasma*

77 A blood gas analyzer ABL 700 (Radiometer, Brønshøj, Denmark) was used to measure free  
 78 Ca<sup>2+</sup>, Na<sup>+</sup> and K<sup>+</sup> content in blood samples and aqueous CaCl<sub>2</sub> solutions<sup>4</sup>. Plasma K<sup>+</sup> and  
 79 Na<sup>+</sup> contents were assessed and corrected for Na<sup>+</sup> and K<sup>+</sup> present in the vacutainer  
 80 anticoagulants (Na-heparin and K3EDTA). To perform the correction an aqueous solution of  
 81 CaCl<sub>2</sub> (1.8 mM final concentration) was prepared and filled into the vacutainers in volumes  
 82 equal to those of the blood samples. Thereafter free Na<sup>+</sup>, K<sup>+</sup> and Ca<sup>2+</sup> were measured. The  
 83 obtained values were subtracted from those measured for blood plasma. The levels of free  
 84 Ca<sup>2+</sup> in the EDTA containing vacutainers were below the detection limit of the ion-selective  
 85 electrode of the blood analyzer for both the aqueous CaCl<sub>2</sub> solution and plasma. All  
 86 measurements were performed at room temperature and in triplicates within an hour after  
 87 blood collection.

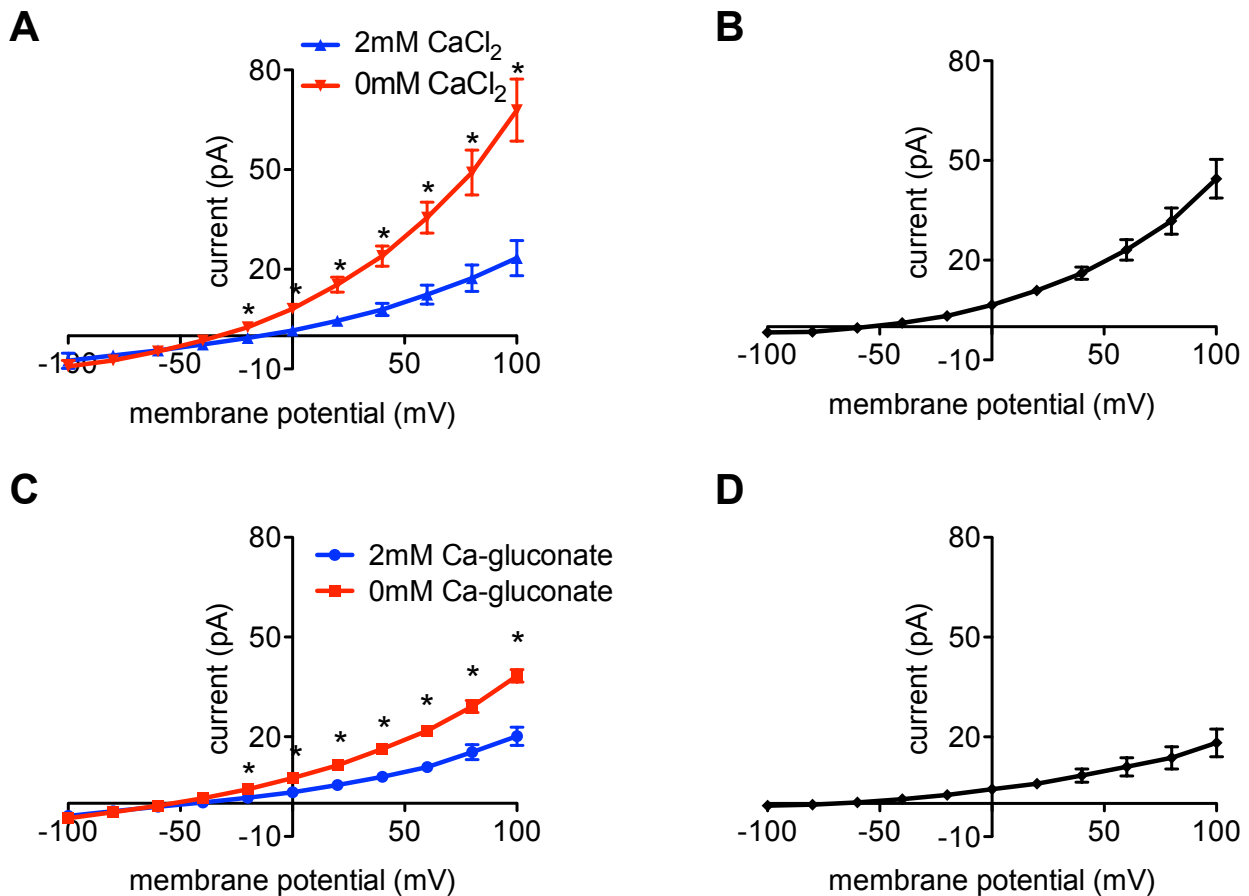

88

89 **Supplemental Figure S1 corresponds to Figure 1 in the main body of the manuscript**  
 90 **with currents being shown in absolute values (pAs).** Whole-cell patch clamp recordings  
 91 in a Cs<sup>+</sup>-based internal and a TEACl-based external solutions **(A)** I/V curves with 2 mM  
 92 CaCl<sub>2</sub> (blue) and 0 mM CaCl<sub>2</sub> (red) in the external solution (n=5(3)) **(B)** I/V curve of the Ca<sup>2+</sup>  
 93 blocked current (CBC) - the current recorded in 2 mM CaCl<sub>2</sub>-external solution was  
 94 subtracted from the current recorded in 0 mM CaCl<sub>2</sub>-external solution. Whole-cell patch  
 95 clamp recordings in a Cs<sup>+</sup>-based internal and a TEANO<sub>3</sub>-based external solution devoid of

96 Cl<sup>-</sup>. **(C)** I/V curves with 2 mM Ca gluconate (blue) and 0 mM Ca gluconate (red) in the  
 97 external solution (n=4(1)). **(D)** I/V curve of the Ca<sup>2+</sup> blocked current (CBC) - the current  
 98 recorded in 2 mM Ca gluconate-external solution was subtracted from the current recorded  
 99 in 0 mM Ca gluconate -external solution. Currents were elicited by voltage steps from -100  
 100 mV to 100 mV for 500 ms in 20 mV increments at V<sub>h</sub> = -30 mV. Measurements were  
 101 performed at room temperature. Data are presented as mean ± SEM. Significance is  
 102 assessed with a paired Student's t test and set at p<0.05. For better visualization, a  
 103 significance anywhere below p<0.05 is denoted with one star.

104

105 *Calculation of the cation flux based on the whole-cell conductance*

106 The cation flux  $J$  across the RBC membrane caused by the ion channel under investigation  
 107 can be calculated as:

$$108 \quad J = J_{SC} \times n \quad (1)$$

109 with  $J_{SC}$  being the flux across the membrane of a single cell and  $n$  being the number of  
 110 RBCs per volume of blood ( $n = 5 \times 10^6 \mu\text{l}^{-1}$ ). In similarity to the calculations in the appendix of  
 111 Kaestner *et al.* 1999<sup>5</sup>, the single cell flux can be estimated as:

$$112 \quad J_{SC} = \frac{G V_m}{q_{el} N_A} \quad (2)$$

113 with  $G$  being the whole cell conductance,  $V_m$  being the membrane potential,  $q_{el}$  being the  
 114 elementary charge and  $N_A$  being Avogadro's number. The whole cell conductance can be  
 115 derived from the slope of the I/V curve in Figure 2F ( $G = 143 \text{ pS}$ ). In a first approximation  
 116 we use for the membrane potential the physiological RBC resting membrane potential  $V_R$   
 117 ( $V_R = -10 \text{ mV}$ ). The above values can be filled in the final equation derived from equations  
 118 (1) and (2):

$$119 \quad J = \frac{G V_R}{q_{el} N_A} n \quad (3)$$

120 Thus the flux due to CiCC is estimated to be  $4.3 \text{ mM min}^{-1}$ .

121

## 122 **References**

- 123 1. Fermo E, Bogdanova A, Petkova-Kirova P, Zaninoni A, Marcello AP, Makhro A, et al.  
 124 "Gardos Channelopathy": a variant of hereditary Stomatocytosis with complex  
 125 molecular regulation. *Sci Rep. Nature Publishing Group*; 2017 May 11;7(1):1744.
- 126 2. Fernandez JM, Fox AP, Krasne S. Membrane patches and whole-cell membranes: a  
 127 comparison of electrical properties in rat clonal pituitary (GH3) cells. *J Physiol (Lond)*.  
 128 Wiley-Blackwell; 1984 Nov;356:565–85.
- 129 3. Knauf PA, Law FY, Marchant PJ. Relationship of net chloride flow across the human

- 130 erythrocyte membrane to the anion exchange mechanism. J Gen Physiol. The  
131 Rockefeller University Press; 1983 Jan;81(1):95–126.
- 132 4. Makhro A, Huisjes R, Verhagen LP, Mañú Pereira MDM, Llaudet-Planas E, Petkova-  
133 Kirova P, et al. Red Cell Properties after Different Modes of Blood Transportation.  
134 Frontiers in Physiology. 2016;7:288.
- 135 5. Kaestner L, Bollensdorff C, Bernhardt I. Non-selective voltage-activated cation channel  
136 in the human red blood cell membrane. Biochim Biophys Acta. 1999 Feb 4;1417(1):9–  
137 15.
- 138
